# Supplementary material for: A Chemometrics-driven Strategy for the Bioactivity Evaluation of Complex Multicomponent Systems and the Effective Selection of Bioactivity-predictive Chemical Combinations
Source: PubMed Central journal article supplement (PMC5442154; doi:10.1038/s41598-017-02499-1), 2017-05-23
Supplement: 41598_2017_2499_MOESM1_ESM.pdf [file 41598_2017_2499_MOESM1_ESM.pdf]

# **A Chemometrics-driven Strategy for the Bioactivity Evaluation of Complex Multicomponent Systems and the Effective Selection of Bioactivity-predictive Chemical Combinations**

Yoshinori Fujimura<sup>1,#,\*</sup>, Chihiro Kawano<sup>1,#</sup>, Ayaka Maeda-Murayama<sup>1</sup>, Asako Nakamura<sup>1</sup>, Akiko Koike-Miki<sup>1</sup>, Daichi Yukihiro<sup>1</sup>, Eisuke Hayakawa<sup>2</sup>, Takanori Ishii<sup>1</sup>, Hirofumi Tachibana<sup>1,3</sup>, Hiroyuki Wariishi<sup>1,3,4</sup>, and Daisuke Miura<sup>1,\*</sup>

<sup>1</sup>Innovation Center for Medical Redox Navigation, Kyushu University, 3-1-1 Maidashi, Higashi-ku, Fukuoka 812-8582, Japan; <sup>2</sup>Okinawa Institute of Science and Technology Graduate University, 1919-1 Tancha, Onna-son, Kunigami-gun, Okinawa 904-0495, Japan; <sup>3</sup>Faculty of Agriculture and <sup>4</sup>Faculty of Arts and Science, Kyushu University, 6-10-1 Hakozaki, Higashi-ku, Fukuoka 812-8581, Japan.

#These authors equally contributed to this work.

\*Correspondence and requests for materials should be addressed to Y. F. (email: fujimurayoshinori@gmail.com) or D.M. (email: daipon@agr.kyushu-u.ac.jp)

The authors declare no conflict of interest.

## Contents:

### Supplementary methods

#### LC–MS analysis

### Supplementary Figures and Tables

**Supplementary Figure S1.** The schematic flow of the peak picking and alignment of non-targeted MALDI–MS data.

**Supplementary Figure S2.** Heatmap representation of the ionization of the representative phytochemicals by MALDI–MS using four matrices dissolved in MeOH solution.

**Supplementary Figure S3.** The representative relationship between the chemical structure and the ionization efficiency of phytochemicals.

**Supplementary Figure S4.** The correlation plot of the highest VIP-valued compounds at the concentration level of GTEs.

**Supplementary Figure S5.** The chart visualization of the observed ORAC values of GTEs using the selected combinations with the highest correlation values.

**Supplementary Figure S6.** The chart visualization of the observed ORAC values of GTEs using the selected combination with low correlation value.

**Supplementary Figure S7.** Scheme of chemometrics-driven selection of GTE bioactivity-correlated chemical combinations.

**Supplementary Figure S8.** Comparison of the MALDI–MS-MP system with the conventional strategy in view of 2 distinct research fields.

**Supplementary Figure S9.** LC–MS-MP of 21 GTEs for evaluating their quality and bioactivity.

**Supplementary Figure S10.** The effect of components with the highest VIP values ( $>1$ ) on the construction of OPLS regression models.

**Supplementary Figure S11.** The evaluation of the robustness of the present MALDI–MS-MP system.

**Supplementary Figure S12.** Graphical representation of MALDI–MS-MP system for the bioactivity evaluation of diverse bioactive sample panels representing multicomponent systems and the effective selection of bioactivity-predictive chemical combinations.

**Supplementary Table S1.** The ionization rates of the representative phytochemicals for MALDI matrix screening.

**Supplementary Table S2.** MALDI–MS datasets of 21 GTEs for multivariate statistical analyses.

**Supplementary Table S3.** The top-40 VIP-valued components highly contributing to the construction of OPLS regression model and their correlations with ORAC values.

**Supplementary Table S4.** Combinations of multiple components with the highest VIP values ( $>1$ ) and their correlation values using three abundance measures.

**Supplementary Table S5.** LC–MS datasets of 21 GTEs for multivariate statistical analyses.

**Supplementary Table S6.** Selected peaks with the highest VIP values ( $>1$ ) contributing to the construction of OPLS regression models in LC–MS datasets.

**Supplementary Table S7.** Selected peaks with the highest VIP values ( $>1$ ) contributing to the construction of the polyphenol-predictive OPLS regression model in MALDI–MS datasets.

## Supplementary methods

**LC–MS analysis.** All GTEs were subjected to LC–MS analysis using a LCMS-IT-TOF instrument (Shimadzu, Kyoto, Japan). The instrument was fitted with a Luna C18(2) column (250 mm × 1.0 mm, 5 μm particle size, Phenomenex, Torrance, CA) maintained at 40°C. The mobile phase solvents were 0.1% aqueous formic acid (solvent A) and methanol (solvent B). Solvent B was 5% for 2.0 min, increased linearly from 5% to 60% over 6.0 min, and further increased from 60% to 100% at 13.0 min, and 100% holding for 4.5 min. Flow rate was constant (0.1 mL/min). The MS instrument was operated using an ESI source in both positive and negative ionization modes with survey scans acquired from  $m/z$  100 to 700. Ionization parameters were as follows: capillary voltage, 4.5 kV and –3.5 kV; nebulizer gas flow, 1.5 L/min; CDL temperature, 250°C; heat block temperature, 250°C. Individual GTEs were diluted 1:50 in distilled water, and then 2.5 μM 4 hydroxybenzophenone was added as an internal standard. Samples were filtered through a 0.22-μm PTFE filter, and 5 μL was injected onto the column for each run.

## Supplementary Figures and Tables

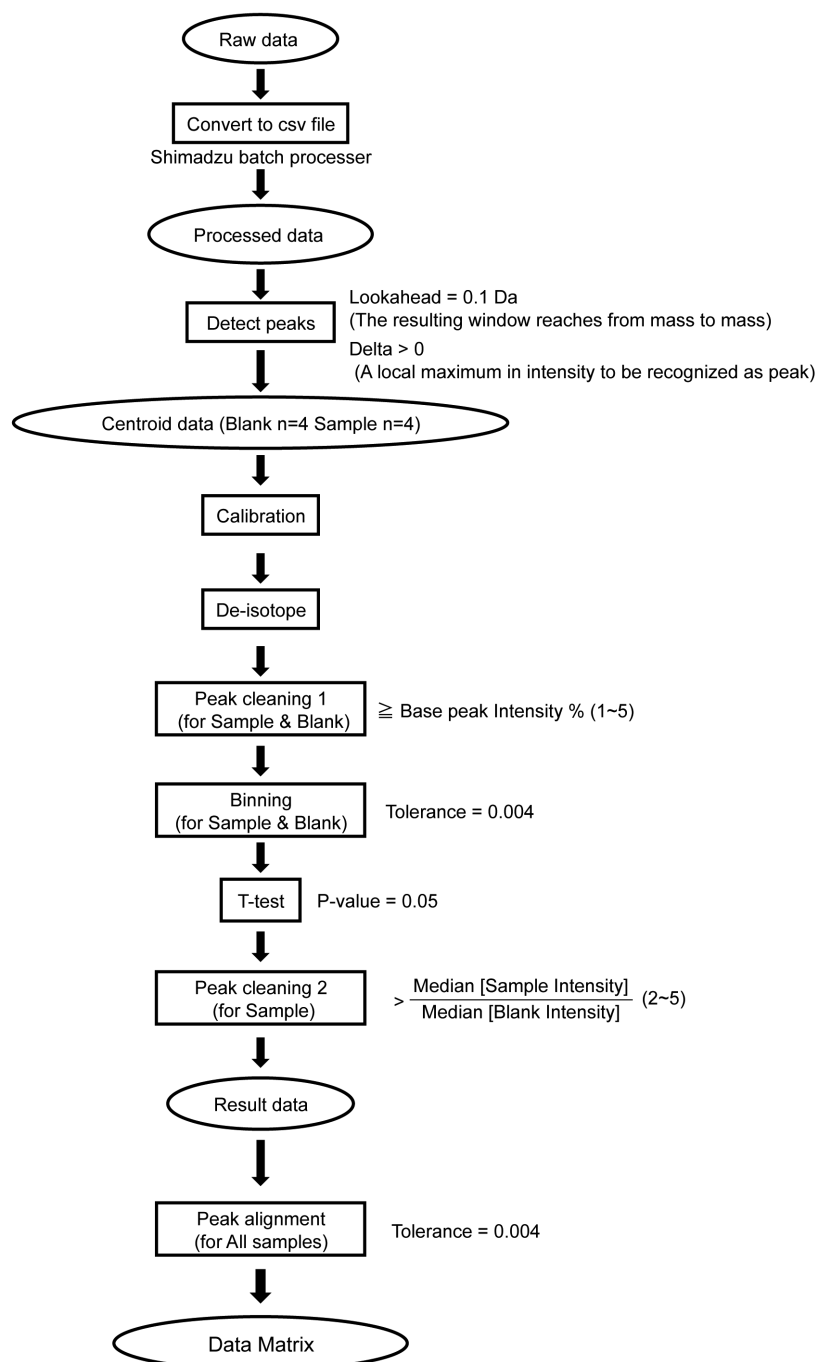

**Supplementary Figure S1. The schematic flow of the peak picking and alignment of non-targeted MALDI-MS data.**

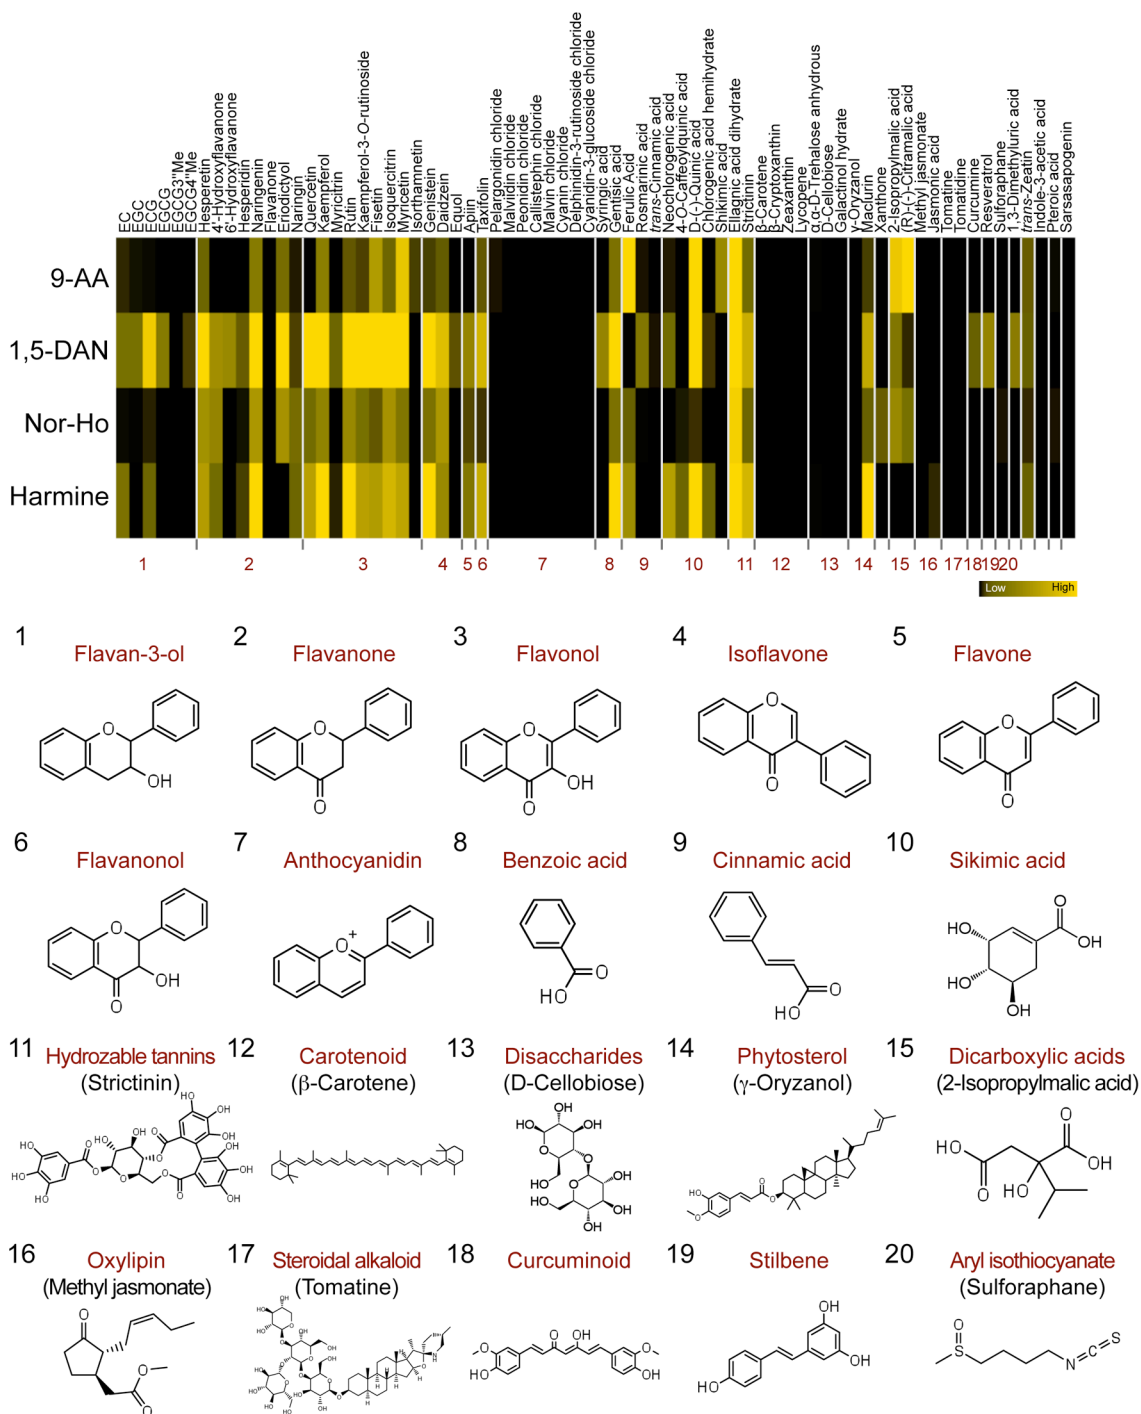

**Supplementary Figure S2. Heatmap representation of the ionization of the representative phytochemicals by MALDI-MS using four matrices dissolved in MeOH solution.** Heatmap analysis showing the different ionization rates of the 72 phytochemicals by the 4 matrices dissolved in 100% MeOH solution. In addition, 20 representative chemical structures of phytochemicals are illustrated.

## A Detection (High)

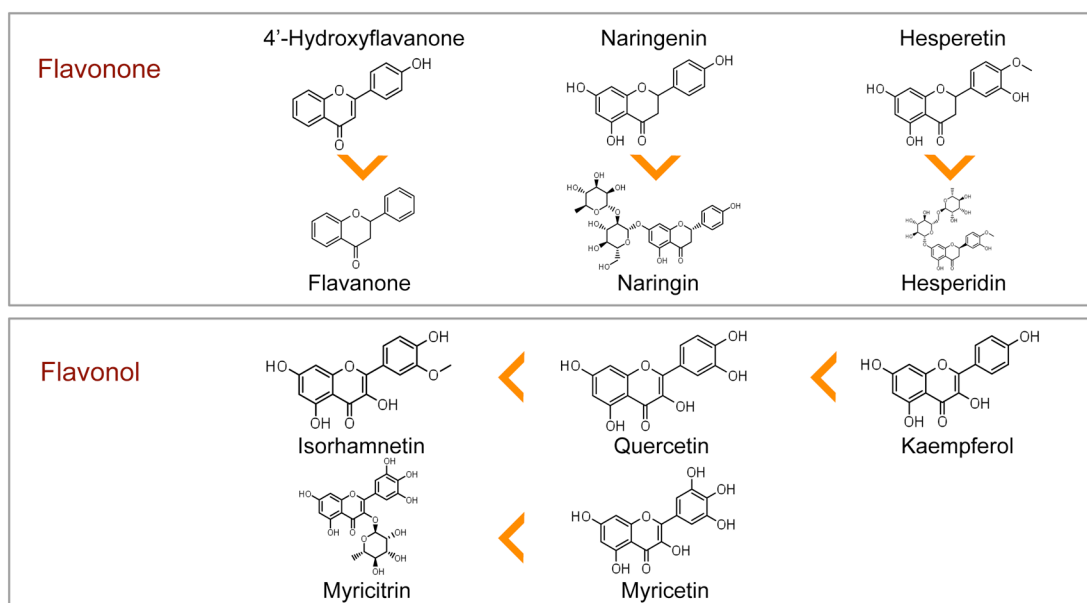

## Detection (Zero or Low)

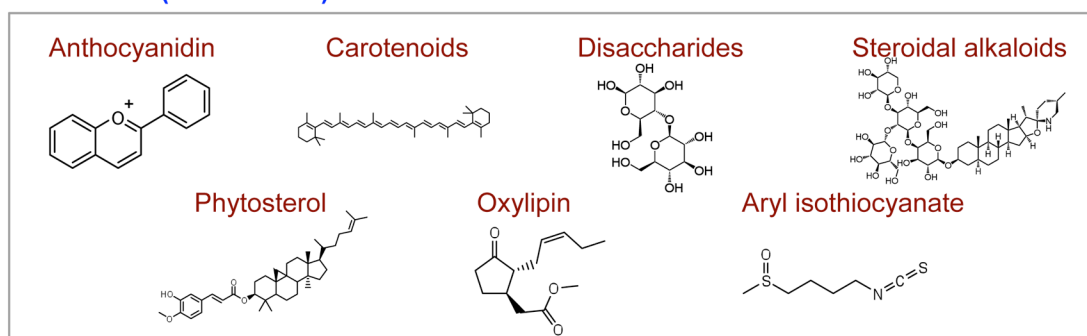

## B 1,5-DAN

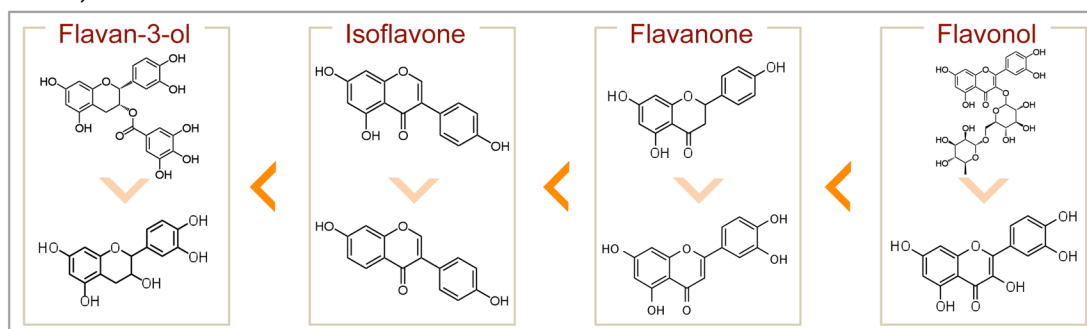

**Supplementary Figure S3. The representative relationship between the chemical structure and the ionization efficiency of phytochemicals.** Among the phytochemicals with different detectability, their representative relationships with the ionization efficiency are shown under conditions observed in (A) four matrices or (B) 1,5-DAN alone. The ionization efficacy of the phytochemicals is partially dependent on the position and the number of glycosylation, methylation, and hydroxylation.

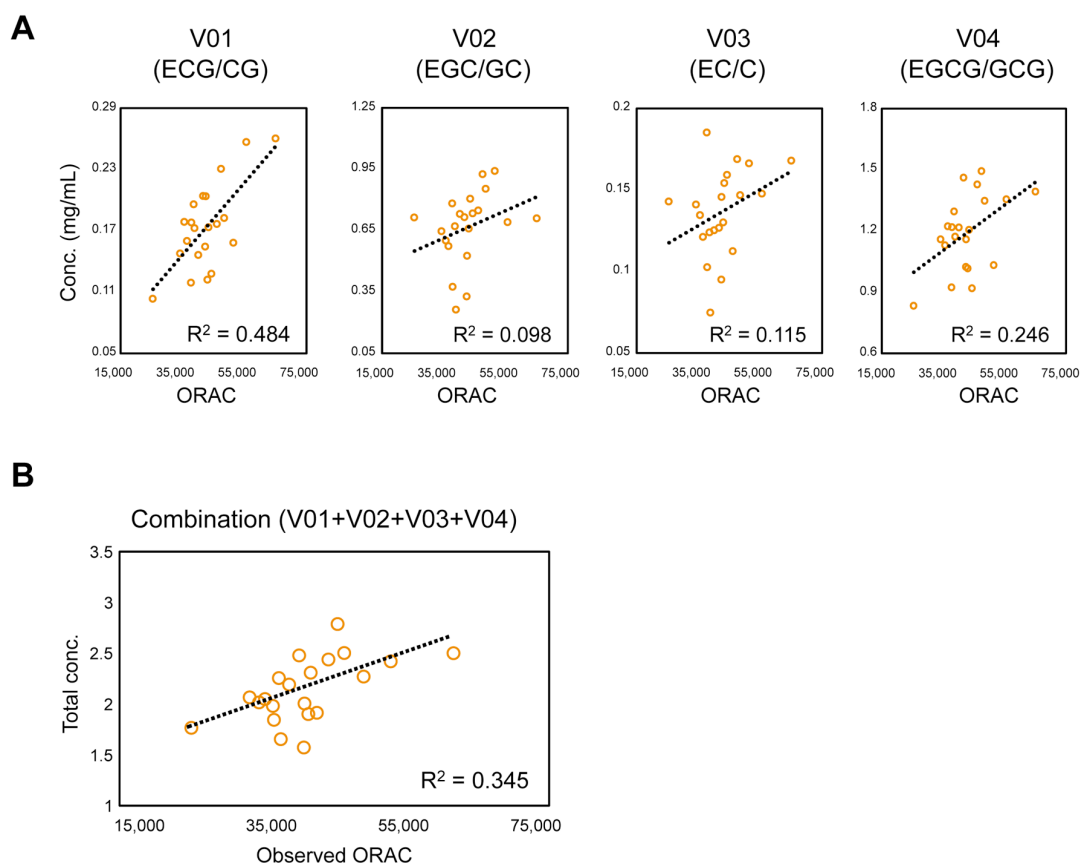

**Supplementary Figure S4. The correlation plot of the highest VIP-valued compounds at the concentration level of GTEs. (A)** Correlations between ORAC and the concentration of each of the top-4 components with the largest VIP values ( $>1$ ). **(B)** Correlations between ORAC and the summed concentrations of the top-4-VIP components.



**A****Relative**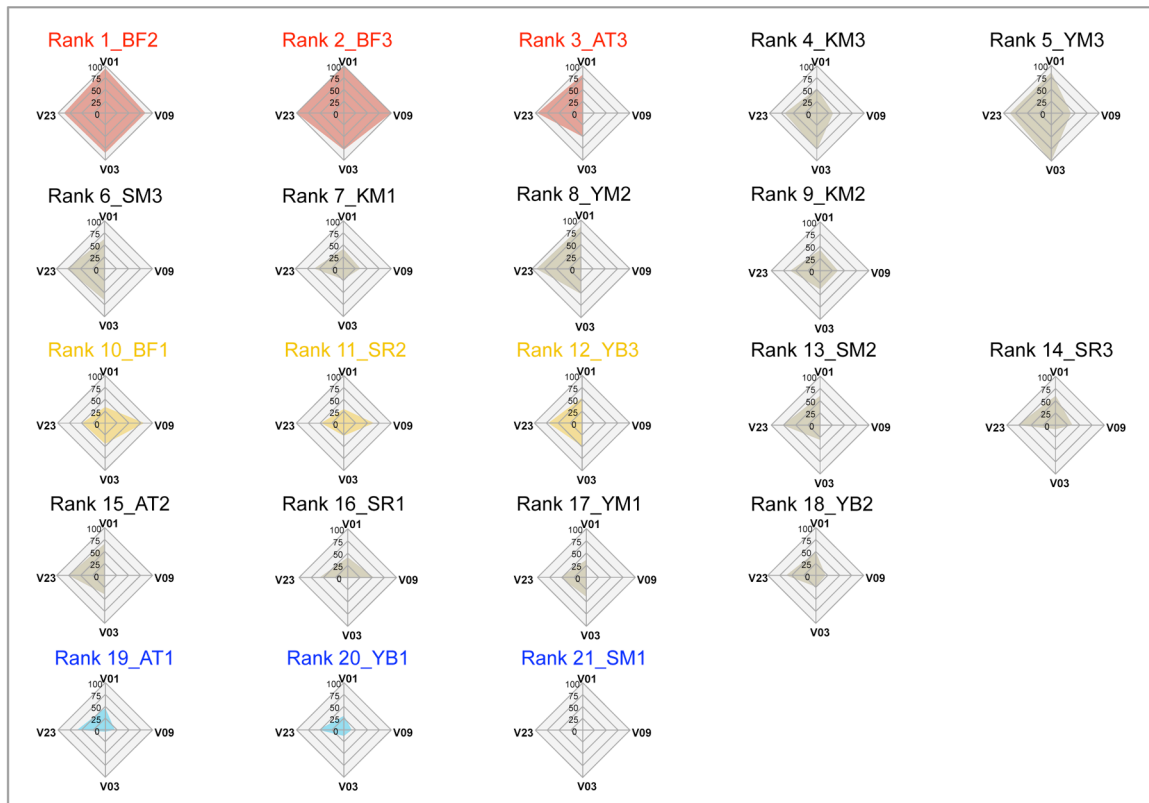**B**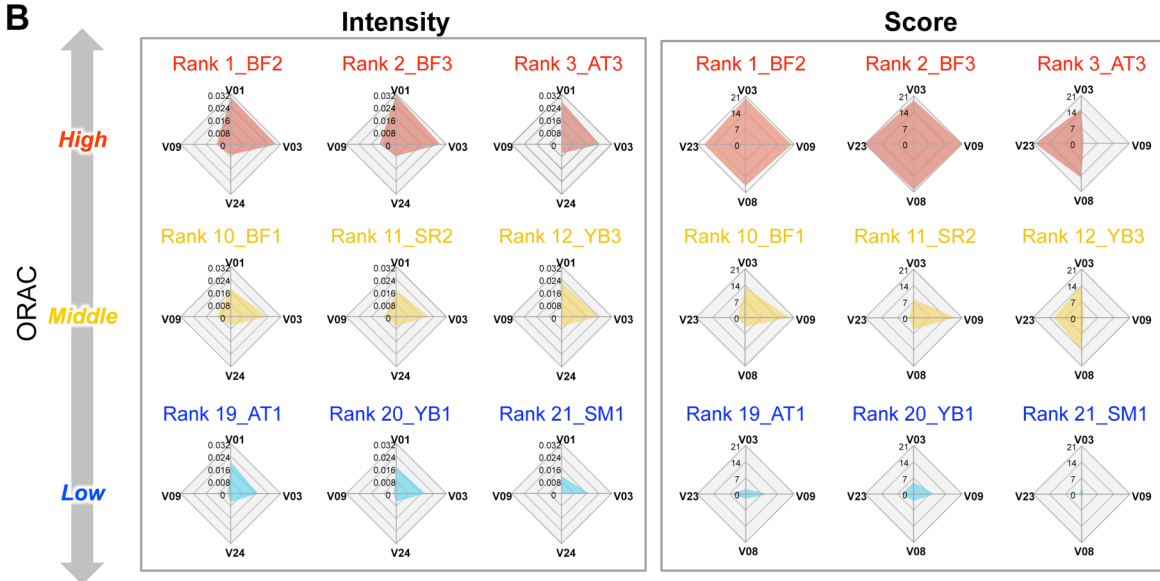

**Supplementary Figure S5. The chart visualization of the observed ORAC values of GTEs using the selected combinations with the highest correlation values. (A) Observed ORAC values of GTEs visualized as radar charts using information from the 4 selected components (V01+V03+V09+V23). Charts for all GTEs are shown. (B) A representative section of the charts for nine GTEs is also illustrated using the Intensity data of the combination (V01+V03+V09+V24) or the Score data of the combination (V03+V08+V09+V23)**

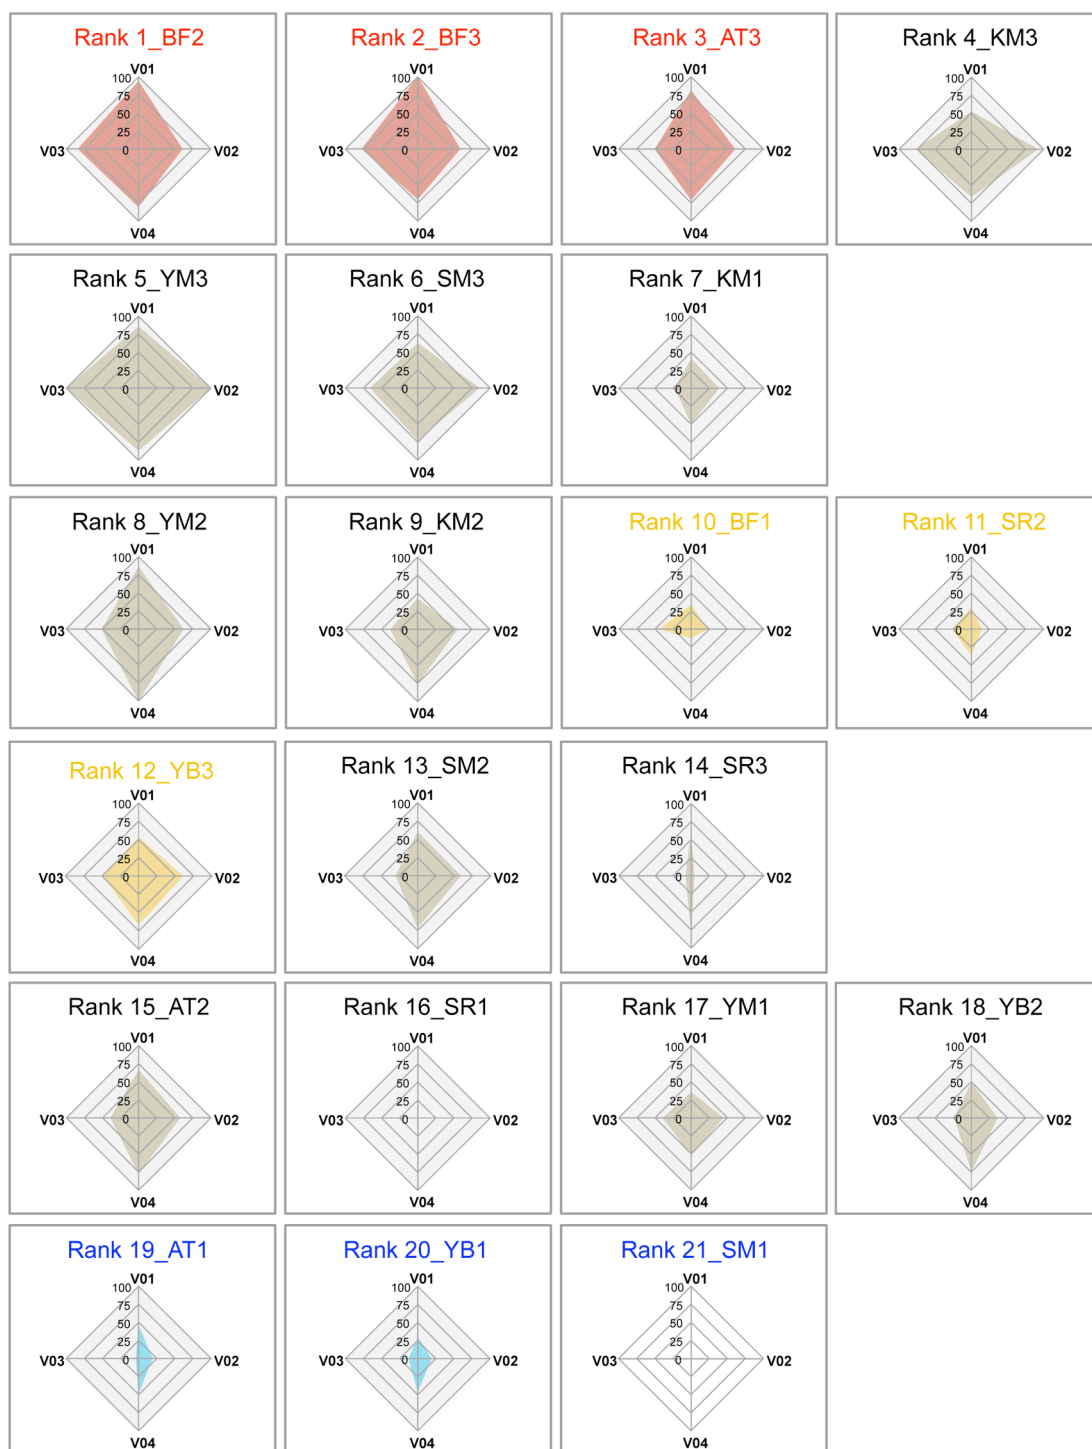

**Supplementary Figure S6. The chart visualization of the observed ORAC values of GTEs using the selected combination with low correlation value.** Observed ORAC values of GTEs visualized as radar charts using information from the 4 selected components (V01+V02+V03+V04) with low correlation value. Charts for all GTEs are shown.

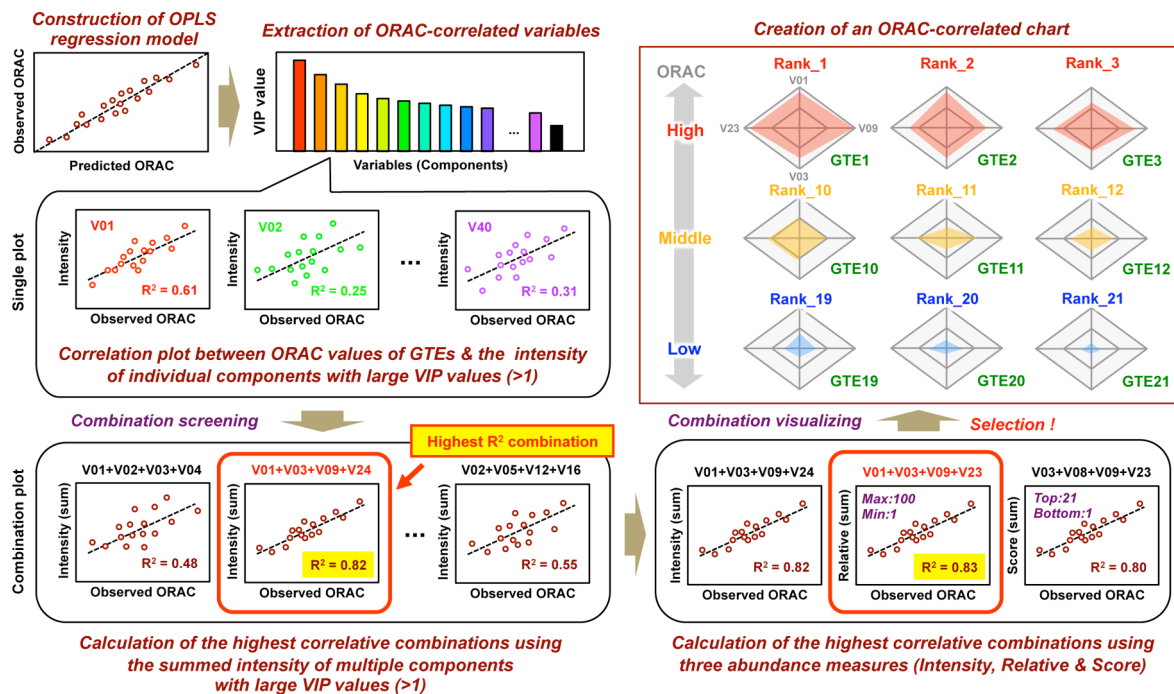

Supplementary Figure S7. Scheme of chemometrics-driven selection of GTE bioactivity-correlated chemical combinations.

|                                                           | <i>In View of Pharmaceutical, Nutraceutical, &amp; Food Functionality Researches</i> |                                      | <i>In View of Metabolomics Research</i>      |                                                         |
|-----------------------------------------------------------|--------------------------------------------------------------------------------------|--------------------------------------|----------------------------------------------|---------------------------------------------------------|
|                                                           | Conventional strategy                                                                | Novel strategy (MALDI-MS-MP)         | Conventional strategy (LC-MS-MP or GC-MS-MP) |                                                         |
| Evaluation target                                         | Single                                                                               | Multiple                             |                                              |                                                         |
| Evaluation unit                                           | Absolute quantity                                                                    | Compositional balance                |                                              |                                                         |
| Narrowing candidate components contributed to bioactivity | Multiple steps                                                                       | One step                             |                                              |                                                         |
| Decision process of combination of multiple components    | Hypothesis or experiment-driven                                                      | Hypothesis-generating or data-driven |                                              |                                                         |
| Bioassay validation (Frequency; labor-intensive)          | High                                                                                 | Low                                  |                                              |                                                         |
|                                                           |                                                                                      | ○                                    | ×                                            | Direct analysis of crude sample                         |
|                                                           |                                                                                      | ◎                                    | △                                            | Rapid & high-throughput                                 |
|                                                           |                                                                                      | ◎                                    | △                                            | Extensibility of sample number (>1,000)                 |
|                                                           |                                                                                      | ○                                    | ○                                            | Theoretical presentation of combination for bioactivity |
|                                                           |                                                                                      | △                                    | ◎                                            | Detective performance of small molecules                |

**Supplementary Figure S8. Comparison of the MALDI-MS-MP system with the conventional strategy in view of 2 distinct research fields.**

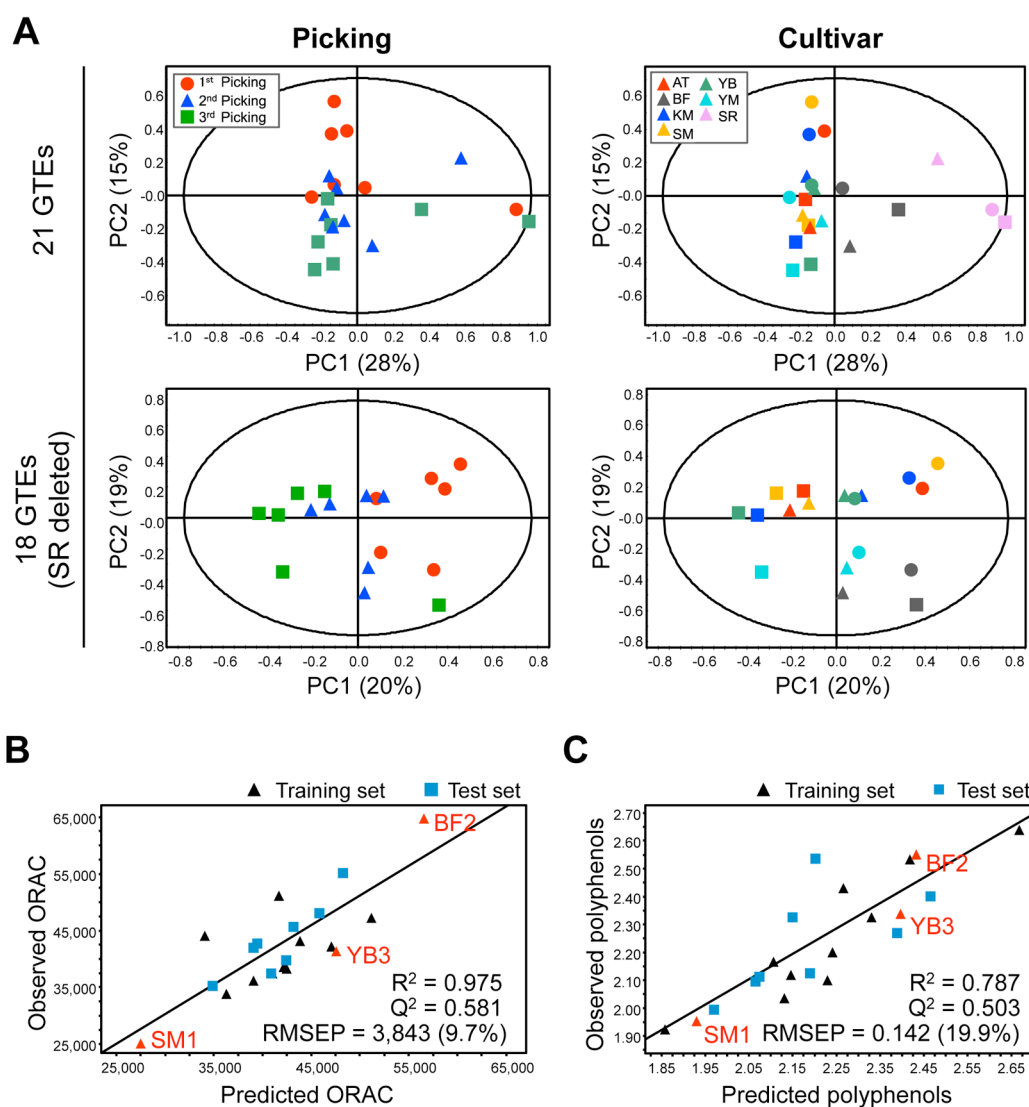

**Supplementary Figure S9. LC–MS–MP of 21 GTEs for evaluating their quality and bioactivity.** (A) PCA score plot of LC–MS datasets of 21 GTEs showing different clusters of MS profiles, based on the attributes of picking seasons and cultivars. (B) Models for predicting (B) ORAC or (C) total polyphenol content were calculated from the LC–MS datasets of 21 GTEs, including 13 training (black triangles) and 8 test (blue squares) sets.

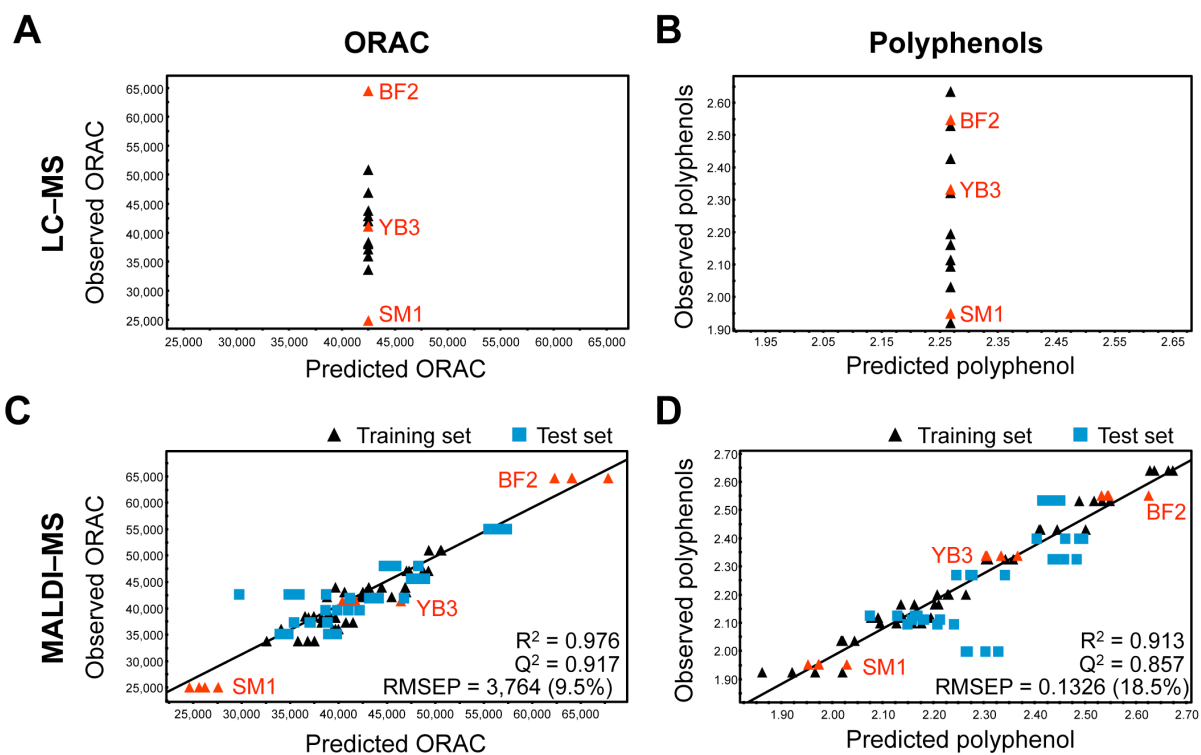

**Supplementary Figure S10. The effect of components with the highest VIP values ( $>1$ ) on the construction of OPLS regression models.** Models for predicting ORAC (**A**, **C**) or total polyphenol content (**B**, **D**) were calculated from the LC-MS (**A**, **B**) or MALDI-MS (**C**, **D**) datasets of 21 GTEs, including 13 training (black triangles) and 8 test (blue squares) sets. These models were constructed using datasets excluding components with the highest VIP values ( $>1$ ).

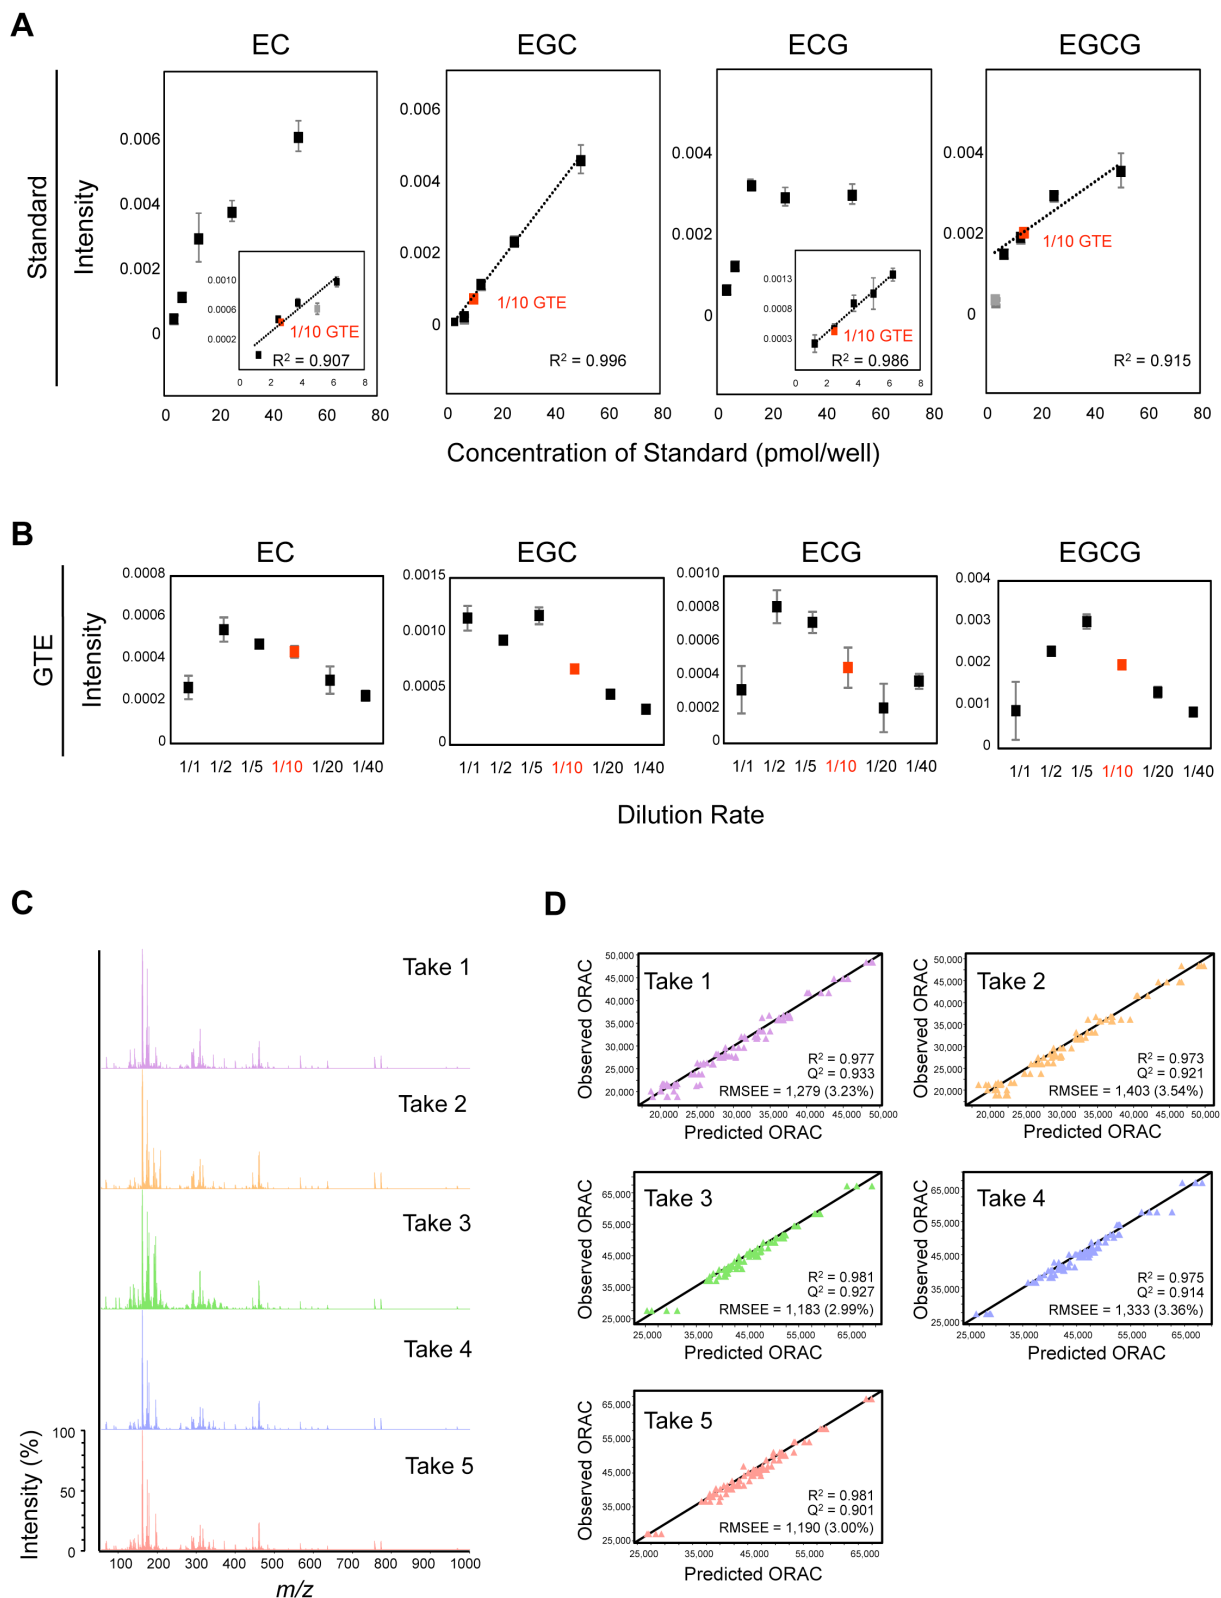

**Supplementary Figure S11. The evaluation of the robustness of the present MALDI-MS-MP system.** (A) The calibration curve from the representative GTE components (EGCG, EGC, ECG, and EC at the standard level) in MALDI-MS system. In EC and EGCG, the coefficient of determination ( $R^2$ ) was calculated using datasets excluding the value of grey square symbol. Red square symbol indicates the data corresponding to 1/10 GTE sample. (B) Plots of these four compounds detected in a dilution series of the representative GTE (YB1). Data are shown as mean  $\pm$  SD ( $n=3-5$ ). (C) Verification of the repeatability of MS data acquired on a different day using the representative GTE (YB1). (D) OPLS regression models using such MS datasets.

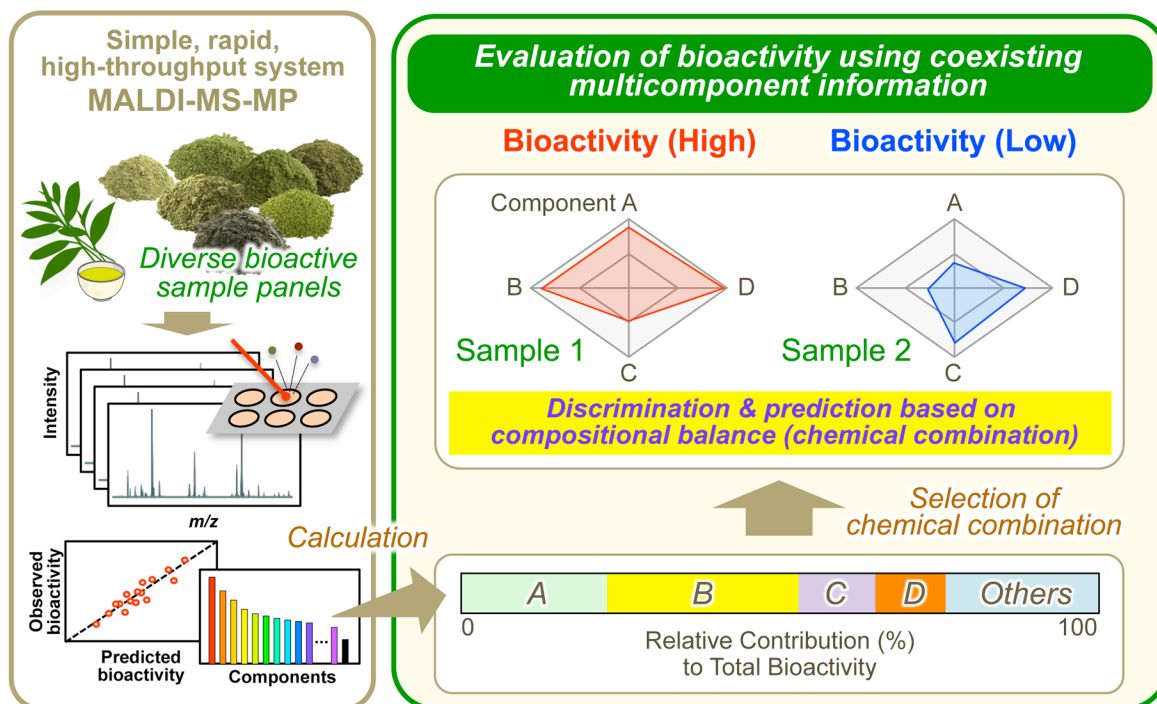

**Supplementary Figure S12. Graphical representation of MALDI–MS–MP system for the bioactivity evaluation of diverse bioactive sample panels representing multicomponent systems and the effective selection of bioactivity-predictive chemical combinations.**



**Supplementary Table S1. The ionization rates of the representative phytochemicals for MALDI matrix screening.**

|                                            | m/z         |                | Acetone |         |        |         | MeOH   |         |        |         |
|--------------------------------------------|-------------|----------------|---------|---------|--------|---------|--------|---------|--------|---------|
|                                            | Theoretical | Observed [M-H] | 9AA     | 1,5-DAN | Nor-Ho | Harmine | 9AA    | 1,5-DAN | Nor-Ho | Harmine |
| EC                                         | 290.08      | 289.07         | 0.0016  | 0.0045  | 0.0006 | 0.0062  | 0.0011 | 0.0070  | 0.0005 | 0.0072  |
| EGC                                        | 306.08      | 305.15         | 0.0003  | 0.0083  | 0.0001 | 0.0022  | 0.0005 | 0.0067  | 0.0003 | 0       |
| ECG                                        | 442.09      | 441.17         | 0.0018  | 0.0123  | 0.0048 | 0.0058  | 0.0004 | 0.0282  | 0.0010 | 0.0046  |
| EGCG                                       | 458.08      | 457.13         | 0.0002  | 0.0066  | 0.0009 | 0.0007  | 0      | 0.0092  | 0.0001 | 0       |
| EGCG3*Me                                   | 472.10      | 471.12         | 0       | 0.0034  | 0.0002 | 0.0002  | 0      | 0       | 0.0001 | 0       |
| EGCG4*Me                                   | 472.10      | 471.03         | 0       | 0.0033  | 0.0008 | 0.0004  | 0      | 0.0019  | 0.0001 | 0       |
| Hesperetin                                 | 302.08      | 301.05         | 0.0095  | 0.0574  | 0.0154 | 0.0245  | 0.0049 | 0.0559  | 0.0147 | 0.0174  |
| 4'-Hydroxyflavanone                        | 240.08      | 239.11         | 0.0026  | 0.0182  | 0.0086 | 0.0125  | 0      | 0.0144  | 0.0125 | 0.0060  |
| 6'-Hydroxyflavanone                        | 240.08      | 239.07         | 0       | 0.0157  | 0.0001 | 0.0007  | 0      | 0.0127  | 0      | 0       |
| Hesperidin                                 | 610.19      | 609.28         | 0.0008  | 0.0039  | 0.0005 | 0.0028  | 0      | 0.0036  | 0.0006 | 0.0018  |
| Naringenin                                 | 272.07      | 271.09         | 0.0170  | 0.0524  | 0.0450 | 0.0444  | 0.0092 | 0.0683  | 0.0164 | 0.0582  |
| Flavanone                                  | 224.08      | 223.10         | 0.0008  | 0.0010  | 0.0001 | 0       | 0      | 0       | 0.0001 | 0       |
| Eriodictyol                                | 288.07      | 287.12         | 0.0151  | 0.0500  | 0.0119 | 0.0658  | 0.0065 | 0.0520  | 0.0151 | 0       |
| Naringin                                   | 580.18      | 579.23         | 0.0017  | 0.0059  | 0.0056 | 0.0033  | 0.0009 | 0.0020  | 0.0062 | 0.0049  |
| Quercetin                                  | 302.04      | 301.08         | 0.0146  | 0.0364  | 0.0143 | 0.0245  | 0      | 0.0687  | 0.0054 | 0.0182  |
| Kaempferol                                 | 286.05      | 285.09         | 0.0192  | 0.0559  | 0.0251 | 0.0399  | 0.0103 | 0.0538  | 0.0116 | 0.0344  |
| Myricitrin                                 | 464.10      | 463.19         | 0.0012  | 0.0034  | 0.0004 | 0.0052  | 0      | 0.0045  | 0.0002 | 0.0009  |
| Rutin                                      | 610.15      | 609.23         | 0.0112  | 0.0702  | 0.0189 | 0.0316  | 0.0030 | 0.0486  | 0.0126 | 0.0302  |
| Kaempferol-3-O-rutinoside                  | 594.16      | 593.23         | 0.0075  | 0.0410  | 0.0162 | 0.0183  | 0.0020 | 0.0328  | 0.0067 | 0.0185  |
| Fisetin                                    | 286.05      | 285.10         | 0.0294  | 0.0339  | 0.0086 | 0.0183  | 0.0170 | 0.0372  | 0.0031 | 0.0168  |
| Isoquercitrin                              | 464.10      | 463.20         | 0.0165  | 0.0276  | 0.0179 | 0.0190  | 0.0048 | 0.0438  | 0.0151 | 0.0231  |
| Myricetin                                  | 318.04      | 317.09         | 0.0275  | 0.0474  | 0.0179 | 0.0179  | 0.0264 | 0.0511  | 0.0088 | 0.0192  |
| Isorhamnetin                               | 316.06      | 315.08         | 0.0017  | 0       | 0      | 0       | 0.0018 | 0       | 0      | 0       |
| Genistein                                  | 270.05      | 269.11         | 0.0037  | 0.0488  | 0.0145 | 0.0221  | 0.0019 | 0.0448  | 0.0071 | 0.0427  |
| Daidzein                                   | 254.06      | 253.10         | 0.0035  | 0.0289  | 0.0148 | 0.0112  | 0.0034 | 0.0247  | 0.0159 | 0.0125  |
| Equol                                      | 242.09      | 241.08         | 0       | 0.0080  | 0      | 0       | 0      | 0.0026  | 0      | 0.0001  |
| Apiin                                      | 564.15      | 563.27         | 0.0023  | 0.0089  | 0.0076 | 0.0043  | 0      | 0.0120  | 0.0022 | 0.0085  |
| Taxifolin                                  | 304.06      | 303.11         | 0.0074  | 0.0149  | 0.0085 | 0.0209  | 0.0031 | 0.0227  | 0.0015 | 0.0210  |
| Pelargonidin chloride                      | 306.03      | 305.04         | 0.0006  | 0       | 0      | 0       | 0.0007 | 0       | 0      | 0       |
| Malvidin chloride                          | 366.05      | 365.06         | 0       | 0       | 0      | 0.0002  | 0      | 0       | 0      | 0       |
| Peonidin chloride                          | 336.04      | 335.11         | 0.0004  | 0       | 0      | 0.0002  | 0      | 0       | 0      | 0       |
| Callistephin chloride                      | 468.08      | -              | 0       | 0       | 0      | 0       | 0      | 0       | 0      | 0       |
| Malvin chloride                            | 690.16      | -              | 0       | 0       | 0      | 0       | 0      | 0       | 0      | 0       |
| Cyanin chloride                            | 646.13      | -              | 0       | 0       | 0      | 0       | 0      | 0       | 0      | 0       |
| Delphinidin-3-rutinoside chloride          | 646.13      | -              | 0       | 0       | 0      | 0       | 0      | 0       | 0      | 0       |
| Cyanidin-3-glucoside chloride              | 484.08      | 483.04         | 0.0002  | 0       | 0      | 0       | 0      | 0       | 0      | 0       |
| Syringic acid                              | 198.05      | 197.12         | 0       | 0.0161  | 0.0018 | 0       | 0      | 0.0123  | 0      | 0       |
| Gentisic acid                              | 154.03      | 152.94         | 0.0135  | 0.0311  | 0.0065 | 0.0565  | 0.0072 | 0.0833  | 0.0071 | 0.0522  |
| Ferulic Acid                               | 194.06      | 193.06         | 0.2511  | 0       | 0.0036 | 0.0161  | 0.2590 | 0       | 0.0038 | 0.0138  |
| Rosmarinic acid                            | 360.08      | 359.16         | 0.0026  | 0       | 0.0015 | 0.0076  | 0.0007 | 0.0081  | 0.0003 | 0       |
| trans-Cinnamic acid                        | 148.05      | 146.99         | 0       | 0.0010  | 0      | 0       | 0      | 0.0007  | 0      | 0       |
| Neochlorogenic acid                        | 354.10      | 353.12         | 0.0030  | 0.0092  | 0.0017 | 0.0164  | 0.0009 | 0.0059  | 0      | 0.0177  |
| 4-O-Caffeoylquinic acid (Chlorogenic acid) | 354.10      | 353.13         | 0.0024  | 0.0011  | 0.0004 | 0.0123  | 0      | 0       | 0.0008 | 0.0046  |
| D-(-)-Quinic acid                          | 192.06      | 190.99         | 0.0857  | 0.0226  | 0.0072 | 0.0692  | 0.0581 | 0.0402  | 0.0014 | 0.0309  |
| Chlorogenic acid hemihydrate               | 354.10      | 353.12         | 0.0022  | 0.0011  | 0.0009 | 0.0112  | 0      | 0.0014  | 0.0002 | 0.0047  |
| Shikimic acid                              | 174.06      | 173.04         | 0.0081  | 0       | 0.0034 | 0       | 0.0132 | 0       | 0      | 0       |
| Ellagic acid dihydrate                     | 302.01      | 301.04         | 0.0620  | 0.0431  | 0.0404 | 0.0660  | 0.0648 | 0.0471  | 0.0285 | 0.0700  |
| Strictinin                                 | 634.08      | 633.14         | 0.0073  | 0.0105  | 0.0083 | 0.0217  | 0.0057 | 0.0213  | 0.0043 | 0.0231  |
| β-Carotene                                 | 536.44      | 535.38         | 0       | 0.0001  | 0      | 0       | 0      | 0       | 0      | 0       |
| β-Cryptoxanthin                            | 552.44      | -              | 0       | 0       | 0      | 0       | 0      | 0       | 0      | 0       |
| Zeaxanthin                                 | 568.43      | -              | 0       | 0       | 0      | 0       | 0      | 0       | 0      | 0       |
| Lycopene                                   | 536.44      | -              | 0       | 0       | 0      | 0       | 0      | 0       | 0      | 0       |
| α,α-D-Trehalose anhydrous                  | 342.12      | 341.07         | 0       | 0       | 0.0001 | 0       | 0.0003 | 0       | 0      | 0.0003  |
| D-Cellobiose                               | 342.12      | 341.15         | 0.0002  | 0       | 0      | 0       | 0      | 0       | 0      | 0       |
| Galactinol hydrate                         | 342.12      | 341.09         | 0.0002  | 0       | 0      | 0       | 0      | 0       | 0      | 0       |
| γ-Oryzanol                                 | 602.44      | 601.33         | 0       | 0.0010  | 0      | 0.0001  | 0.0002 | 0       | 0      | 0       |
| Maclurin                                   | 262.05      | 261.07         | 0.0050  | 0.0266  | 0.0059 | 0.0456  | 0.0018 | 0.0199  | 0.0041 | 0.0307  |
| Xanthone                                   | 196.06      | 195.07         | 0       | 0       | 0.0112 | 0       | 0      | 0       | 0.0036 | 0       |
| 2-Isopropylmalic acid                      | 176.07      | 175.03         | 0.0353  | 0.0112  | 0.0129 | 0.0717  | 0.0269 | 0.0085  | 0.0126 | 0       |
| (R)-(-)-Citramalic acid                    | 148.04      | 146.95         | 0.0696  | 0.0012  | 0.0154 | 0       | 0.0815 | 0.0011  | 0.0069 | 0       |
| Methyl jasmonate                           | 224.14      | 223.10         | 0.0011  | 0       | 0      | 0       | 0      | 0       | 0      | 0       |
| Jasmonic acid                              | 210.13      | 209.09         | 0.0030  | 0.0093  | 0.0004 | 0.0070  | 0      | 0       | 0      | 0.0011  |
| Tomatine                                   | 1033.55     | 1032.49        | 0       | 0.0004  | 0.0002 | 0       | 0      | 0       | 0.0001 | 0       |
| Tomatidine                                 | 415.35      | -              | 0       | 0       | 0      | 0       | 0      | 0       | 0      | 0       |
| Curcumine                                  | 368.13      | 367.08         | 0.0003  | 0       | 0.0001 | 0       | 0.0002 | 0.0037  | 0.0001 | 0       |
| Resveratrol                                | 228.08      | 227.17         | 0       | 0.0189  | 0.0002 | 0.0076  | 0      | 0.0121  | 0      | 0       |
| Sulforaphane                               | 177.03      | 175.92         | 0       | 0       | 0.0010 | 0       | 0      | 0       | 0.0006 | 0       |
| 1,3-Dimethyluric acid                      | 196.06      | 195.08         | 0       | 0.0397  | 0      | 0.0611  | 0      | 0.0100  | 0      | 0       |
| trans-Zeatin                               | 219.11      | 218.17         | 0.0046  | 0.0113  | 0      | 0.0139  | 0.0035 | 0.0041  | 0.0012 | 0.0041  |
| Indole-3-acetic acid                       | 175.06      | 173.97         | 0       | 0       | 0      | 0.0005  | 0      | 0       | 0      | 0       |
| Pteric acid                                | 312.10      | 311.21         | 0       | 0       | 0.0014 | 0.0103  | 0.0004 | 0       | 0.0006 | 0       |
| Sarsasapogenin                             | 416.33      | 415.12         | 0       | 0       | 0      | 0       | 0      | 0       | 0      | 0       |











(continued)

Table with columns: m/z, R.T., Polarity, Name (CHAC), A11, A12, A13, BF1, BF2, BF3, KM1, KM2, KM3, SM1, SM2, SM3, SR1, SR2, SR3, YB1, YB2, YB3, YM1, YM2, YM3. The table contains a large number of rows (lines 1 to 4800) listing mass spectrometry data.





## Supplementary Table S6. Selected peaks with the highest VIP values (>1) contributing to the construction of OPLS regression models in LC-MS datasets.

| Variables | VIP  | m/z    | R.T    | Polar | (Name)  | AT1     | AT2     | AT3     | BF1     | BF2     | BF3     | KM1     | KM2     | KM3     | SM1     | SM2     | SM3     | SR1     | SR2     | SR3     | YB1     | YB2     | YB3     | YM1     | YM2     | YM3     |
|-----------|------|--------|--------|-------|---------|---------|---------|---------|---------|---------|---------|---------|---------|---------|---------|---------|---------|---------|---------|---------|---------|---------|---------|---------|---------|---------|
|           |      |        |        |       | (ORAC)  | 36.61   | 51.482  | 42.552  | 65.065  | 55.612  | 44.001  | 43.717  | 48.544  | 25.445  | 40.191  | 46.160  | 37.930  | 42.436  | 38.953  | 34.266  | 36.545  | 41.729  | 37.746  | 43.496  | 47.566  |         |
| V01       | 6.37 | 441.07 | 8.943  | -     | 0.03435 | 0.04153 | 0.04070 | 0.04440 | 0.04200 | 0.03910 | 0.02870 | 0.03040 | 0.03740 | 0.02393 | 0.03289 | 0.03600 | 0.03320 | 0.03700 | 0.03610 | 0.03320 | 0.03700 | 0.04040 | 0.03070 | 0.03380 | 0.03800 | 0.04040 |
| V02       | 6.12 | 457.07 | 8.817  | -     | 0.10863 | 0.13601 | 0.12600 | 0.12700 | 0.13200 | 0.13030 | 0.11000 | 0.11800 | 0.13200 | 0.09222 | 0.12879 | 0.14100 | 0.10600 | 0.10078 | 0.10800 | 0.11900 | 0.13500 | 0.15100 | 0.11200 | 0.12100 | 0.12100 | 0.13900 |
| V03       | 4.76 | 795.11 | 2.169  | -     | 0.02335 | 0.01038 | 0.05655 | 0.02800 | 0.01323 | 0.00665 | 0.02470 | 0.01600 | 0.00634 | 0.02769 | 0.01687 | 0.00914 | 0.01060 | 0.01285 | 0.01050 | 0.02370 | 0.01635 | 0.00553 | 0.02540 | 0.01600 | 0.01678 |         |
| V04       | 4.52 | 303.06 | 10.533 | +     | 0.10869 | 0.04191 | 0.05430 | 0.03130 | 0.02026 | 0.02780 | 0.00854 | 0.02890 | 0.00827 | 0.05213 | 0.00146 | 0.00307 | 0.00006 | 0.04873 | 0.04024 | 0.00000 | 0.00784 | 0.03100 | 0.00784 | 0.03100 | 0.01330 | 0.01330 |
| V05       | 4.10 | 671.81 | 18.04  | +     | 0.01614 | 0.00541 | 0.00360 | 0.00729 | 0.02910 | 0.03200 | 0.00536 | 0.00420 | 0.00938 | 0.00420 | 0.03829 | 0.01760 | 0.00938 | 0.00479 | 0.03380 | 0.00129 | 0.03130 | 0.03410 | 0.01630 | 0.01630 | 0.00882 | 0.00390 |
| V06       | 3.71 | 523.14 | 11.193 | -     | 0.00000 | 0.00000 | 0.00000 | 0.00988 | 0.01010 | 0.00667 | 0.00000 | 0.00001 | 0.00001 | 0.00000 | 0.00000 | 0.00000 | 0.00000 | 0.00000 | 0.00000 | 0.00000 | 0.00000 | 0.00000 | 0.00000 | 0.00000 | 0.00000 |         |
| V07       | 3.57 | 445.92 | 8.654  | -     | 0.00007 | 0.01610 | 0.01090 | 0.01330 | 0.01400 | 0.01230 | 0.00756 | 0.00960 | 0.00961 | 0.00020 | 0.00020 | 0.00020 | 0.01050 | 0.00963 | 0.01010 | 0.00075 | 0.00968 | 0.01140 | 0.00784 | 0.00604 | 0.01010 |         |
| V08       | 3.46 | 471.08 | 9.388  | -     | 0.00016 | 0.00027 | 0.00000 | 0.01010 | 0.00883 | 0.00854 | 0.00242 | 0.00282 | 0.00451 | 0.00002 | 0.00004 | 0.00002 | 0.00534 | 0.00613 | 0.00227 | 0.00000 | 0.00024 | 0.00064 | 0.00017 | 0.00238 | 0.00394 |         |
| V09       | 3.26 | 531.14 | 11.069 | -     | 0.00000 | 0.00000 | 0.00000 | 0.00748 | 0.01030 | 0.01320 | 0.00000 | 0.00000 | 0.00000 | 0.00000 | 0.00000 | 0.00000 | 0.00000 | 0.00000 | 0.00000 | 0.00000 | 0.00000 | 0.00000 | 0.00000 | 0.00000 |         |         |
| V10       | 3.12 | 205.15 | 10.431 | -     | 0.01643 | 0.01673 | 0.01540 | 0.01060 | 0.01220 | 0.00793 | 0.02240 | 0.01870 | 0.01440 | 0.01904 | 0.01060 | 0.01630 | 0.01650 | 0.01155 | 0.00850 | 0.02308 | 0.02210 | 0.01680 | 0.01680 | 0.01680 | 0.01680 |         |
| V11       | 3.00 | 337.16 | 2.346  | +     | 0.00194 | 0.00201 | 0.00184 | 0.00287 | 0.00049 | 0.01518 | 0.00183 | 0.00522 | 0.00061 | 0.00769 | 0.00254 | 0.01023 | 0.01016 | 0.00194 | 0.00092 | 0.00183 | 0.01116 | 0.00506 | 0.00506 | 0.00076 | 0.00218 |         |
| V12       | 2.95 | 589.16 | 11.082 | -     | 0.00000 | 0.00000 | 0.00000 | 0.00447 | 0.00579 | 0.00498 | 0.00000 | 0.00000 | 0.00000 | 0.00000 | 0.00000 | 0.00000 | 0.00000 | 0.00000 | 0.00000 | 0.00000 | 0.00000 | 0.00000 | 0.00000 | 0.00000 |         |         |
| V13       | 2.79 | 523.84 | 11.116 | -     | 0.00000 | 0.00000 | 0.00000 | 0.00532 | 0.00563 | 0.00373 | 0.00000 | 0.00000 | 0.00000 | 0.00000 | 0.00000 | 0.00000 | 0.00000 | 0.00000 | 0.00000 | 0.00000 | 0.00000 | 0.00000 | 0.00000 |         |         |         |
| V14       | 2.68 | 177.12 | 10.611 | -     | 0.00220 | 0.00454 | 0.00666 | 0.00223 | 0.00445 | 0.00446 | 0.00000 | 0.00000 | 0.00000 | 0.00000 | 0.00000 | 0.00000 | 0.00000 | 0.00000 | 0.00000 | 0.00000 | 0.00000 | 0.00000 | 0.00000 |         |         |         |
| V15       | 2.75 | 387.11 | 1.833  | -     | 0.00877 | 0.00555 | 0.00733 | 0.00561 | 0.00289 | 0.00516 | 0.00697 | 0.00503 | 0.00475 | 0.00509 | 0.00609 | 0.00465 | 0.00369 | 0.00447 | 0.00485 | 0.00440 | 0.00545 | 0.00447 | 0.00882 | 0.00681 |         |         |
| V16       | 2.75 | 672.62 | 18.009 | +     | 0.00949 | 0.03333 | 0.00900 | 0.00660 | 0.00111 | 0.01660 | 0.00000 | 0.00710 | 0.01411 | 0.00984 | 0.00232 | 0.02626 | 0.00221 | 0.00997 | 0.00287 | 0.02380 | 0.00216 | 0.00231 | 0.01773 | 0.00395 |         |         |
| V17       | 2.57 | 295.17 | 13.644 | -     | 0.01638 | 0.00236 | 0.01460 | 0.01560 | 0.00446 | 0.01450 | 0.02770 | 0.01680 | 0.00584 | 0.02587 | 0.00585 | 0.01620 | 0.01174 | 0.01583 | 0.00241 | 0.00513 | 0.01320 | 0.00900 | 0.00502 | 0.01290 |         |         |
| V18       | 2.65 | 341.11 | 1.837  | -     | 0.00713 | 0.00454 | 0.00603 | 0.00440 | 0.00193 | 0.00410 | 0.00598 | 0.00420 | 0.00377 | 0.00817 | 0.00492 | 0.03356 | 0.00264 | 0.00338 | 0.00384 | 0.00438 | 0.00437 | 0.00264 | 0.00277 | 0.00549 |         |         |
| V19       | 2.64 | 371.10 | 8.233  | +     | 0.00044 | 0.00089 | 0.00287 | 0.00000 | 0.00019 | 0.00020 | 0.00277 | 0.00125 | 0.00046 | 0.00795 | 0.00202 | 0.00017 | 0.00043 | 0.00039 | 0.00118 | 0.00251 | 0.00146 | 0.00020 | 0.00111 | 0.00060 |         |         |
| V20       | 2.61 | 457.18 | 8.233  | +     | 0.00162 | 0.01020 | 0.00226 | 0.00200 | 0.00329 | 0.00160 | 0.00210 | 0.00180 | 0.00180 | 0.00210 | 0.00180 | 0.00210 | 0.00180 | 0.00210 | 0.00180 | 0.00210 | 0.00180 | 0.00210 | 0.00180 | 0.00210 |         |         |
| V21       | 2.58 | 277.18 | 13.644 | -     | 0.01285 | 0.01614 | 0.01150 | 0.01200 | 0.00304 | 0.01150 | 0.01300 | 0.01150 | 0.01300 | 0.00475 | 0.02166 | 0.00606 | 0.01350 | 0.00146 | 0.01216 | 0.01196 | 0.00404 | 0.01170 | 0.00404 | 0.01170 |         |         |
| V22       | 2.55 | 307.28 | 2.367  | +     | 0.00719 | 0.00519 | 0.00450 | 0.00594 | 0.00290 | 0.00276 | 0.00865 | 0.00875 | 0.04888 | 0.00835 | 0.00957 | 0.05885 | 0.00411 | 0.00247 | 0.00314 | 0.01040 | 0.00545 | 0.00432 | 0.00681 | 0.00521 |         |         |
| V23       | 2.55 | 459.09 | 8.914  | +     | 0.05034 | 0.08195 | 0.05710 | 0.05680 | 0.05690 | 0.04770 | 0.04570 | 0.05550 | 0.05880 | 0.04328 | 0.05691 | 0.06350 | 0.05310 | 0.04888 | 0.05730 | 0.05430 | 0.06330 | 0.06750 | 0.04850 | 0.05560 |         |         |
| V24       | 2.54 | 245.92 | 14.654 | -     | 0.00000 | 0.00000 | 0.00000 | 0.00223 | 0.00223 | 0.00223 | 0.00223 | 0.00223 | 0.00223 | 0.00223 | 0.00223 | 0.00223 | 0.00223 | 0.00223 | 0.00223 | 0.00223 | 0.00223 | 0.00223 | 0.00223 |         |         |         |
| V25       | 2.39 | 531.64 | 11.073 | -     | 0.00000 | 0.00000 | 0.00000 | 0.00375 | 0.00259 | 0.00678 | 0.00000 | 0.00000 | 0.00000 | 0.00000 | 0.00000 | 0.00000 | 0.00000 | 0.00000 | 0.00000 | 0.00000 | 0.00000 | 0.00000 | 0.00000 |         |         |         |
| V26       | 2.35 | 337.09 | 9.563  | -     | 0.00773 | 0.00222 | 0.00112 | 0.01220 | 0.01410 | 0.00512 | 0.01280 | 0.00871 | 0.00512 | 0.01094 | 0.01074 | 0.01018 | 0.00918 | 0.00684 | 0.00287 | 0.02220 | 0.01600 | 0.01070 | 0.01100 | 0.00672 |         |         |
| V27       | 2.32 | 563.14 | 9.646  | -     | 0.00658 | 0.01150 | 0.01110 | 0.00228 | 0.00251 | 0.00257 | 0.00286 | 0.01100 | 0.00948 | 0.01058 | 0.01241 | 0.01280 | 0.00912 | 0.00251 | 0.00146 | 0.00820 | 0.01110 | 0.01190 | 0.01639 | 0.00625 |         |         |
| V28       | 2.29 | 457.18 | 8.233  | +     | 0.00007 | 0.00009 | 0.00000 | 0.00000 | 0.00000 | 0.00000 | 0.00000 | 0.00000 | 0.00000 | 0.00000 | 0.00000 | 0.00000 | 0.00000 | 0.00000 | 0.00000 | 0.00000 | 0.00000 | 0.00000 |         |         |         |         |
| V29       | 2.28 | 565.15 | 9.616  | -     | 0.01701 | 0.02221 | 0.02280 | 0.00699 | 0.00889 | 0.00795 | 0.01800 | 0.02070 | 0.01978 | 0.02230 | 0.02600 | 0.00367 | 0.00681 | 0.00412 | 0.01820 | 0.02250 | 0.02070 | 0.02120 | 0.01420 |         |         |         |
| V30       | 2.21 | 424.09 | 8.708  | -     | 0.00000 | 0.00000 | 0.00000 | 0.00193 | 0.00273 | 0.00218 | 0.00000 | 0.00000 | 0.00000 | 0.00000 | 0.00000 | 0.00000 | 0.00000 | 0.00000 | 0.00000 | 0.00000 | 0.00000 | 0.00000 |         |         |         |         |
| V31       | 2.04 | 391.99 | 10.811 | -     | 0.00282 | 0.00344 | 0.00458 | 0.00118 | 0.00118 | 0.00118 | 0.00118 | 0.00118 | 0.00118 | 0.00118 | 0.00118 | 0.00118 | 0.00118 | 0.00118 | 0.00118 | 0.00118 | 0.00118 | 0.00118 |         |         |         |         |
| V32       | 2.03 | 158.08 | 2.173  | +     | 0.00400 | 0.00178 | 0.00093 | 0.00480 | 0.00221 | 0.01417 | 0.00343 | 0.00294 | 0.00248 | 0.00949 | 0.00247 | 0.01048 | 0.00172 | 0.01092 | 0.01072 | 0.00488 | 0.00296 | 0.00508 | 0.00448 | 0.00255 |         |         |
| V33       | 2.01 | 303.05 | 10.143 | +     | 0.01680 | 0.01634 | 0.02530 | 0.00684 | 0.00858 | 0.00981 | 0.01650 | 0.01410 | 0.02090 | 0.02098 | 0.01255 | 0.01780 | 0.01960 | 0.02113 | 0.02090 | 0.01440 | 0.01110 | 0.01750 | 0.00584 | 0.00525 |         |         |
| V34       | 1.96 | 524.13 | 11.003 | -     | 0.00005 | 0.00051 | 0.00086 | 0.00304 | 0.00391 | 0.00473 | 0.00000 | 0.00000 | 0.00205 | 0.00046 | 0.00171 | 0.01128 | 0.00000 | 0.00000 | 0.00000 | 0.00000 | 0.00254 | 0.00719 | 0.00744 |         |         |         |
| V35       | 1.90 | 306.06 | 13.644 | -     | 0.04370 | 0.03586 | 0.03586 | 0.00220 | 0.00220 | 0.00220 | 0.00220 | 0.00220 | 0.00220 | 0.00220 | 0.00220 | 0.00220 | 0.00220 | 0.00220 | 0.00220 | 0.00220 | 0.00220 | 0.00220 |         |         |         |         |
| V36       | 1.76 | 291.08 | 9.181  | +     | 0.01825 | 0.02057 | 0.02290 | 0.02310 | 0.02480 | 0.02180 | 0.02210 | 0.02140 | 0.02210 | 0.02140 | 0.02177 | 0.01931 | 0.02100 | 0.01710 | 0.01330 | 0.02360 | 0.01950 | 0.02200 | 0.02810 | 0.02310 |         |         |
| V37       | 1.71 | 577.15 | 10.015 | -     | 0.00079 | 0.00214 | 0.00243 | 0.00117 | 0.00196 | 0.00235 | 0.00190 | 0.00041 | 0.00158 | 0.00046 | 0.00111 | 0.01019 | 0.00094 | 0.00175 | 0.01054 | 0.00227 | 0.00039 | 0.00124 | 0.00218 | 0.00273 |         |         |
| V38       | 1.70 | 291.99 | 10.811 | -     | 0.00062 | 0.00067 | 0.00091 | 0.00018 | 0.00018 | 0.0     |         |         |         |         |         |         |         |         |         |         |         |         |         |         |         |         |

**Supplementary Table S7.** Selected peaks with the highest VIP values (>1) contributing to the construction of the polyphenol-predictive OPLS regression model in MALDI-MS datasets.

| Variables | m/z    | VIP  | (Name)<br>(Polyphenol) | AT1     | AT2     | AT3     | BF1     | BF2     | BF3     | KM1     | KM2     | KM3     | SM1     | SM2     | SM3     | SR1     | SR2     | SR3     | YB1     | YB2     | YB3     | YM1     | YM2     | YM3     |
|-----------|--------|------|------------------------|---------|---------|---------|---------|---------|---------|---------|---------|---------|---------|---------|---------|---------|---------|---------|---------|---------|---------|---------|---------|---------|
| V01       | 170.08 | 3.52 |                        | 1.93    | 2.11    | 2.54    | 2.04    | 2.56    | 2.54    | 2.00    | 2.11    | 2.41    | 1.96    | 2.13    | 2.33    | 2.44    | 2.33    | 2.17    | 2.12    | 2.13    | 2.34    | 2.21    | 2.28    | 2.65    |
| V02       | 305.19 | 3.20 |                        | 0.04360 | 0.00010 | 0.00010 | 0.00010 | 0.00010 | 0.00010 | 0.03820 | 0.00010 | 0.00010 | 0.00010 | 0.00010 | 0.00010 | 0.00010 | 0.00010 | 0.00010 | 0.00010 | 0.00010 | 0.00010 | 0.00010 | 0.00010 | 0.00010 |
| V03       | 132.97 | 2.69 |                        | 0.04070 | 0.05580 | 0.05710 | 0.04220 | 0.05710 | 0.05640 | 0.04840 | 0.05490 | 0.06950 | 0.04650 | 0.05640 | 0.06680 | 0.03360 | 0.03900 | 0.03480 | 0.04070 | 0.04740 | 0.05710 | 0.05080 | 0.05760 | 0.07250 |
| V04       | 289.19 | 2.33 |                        | 0.02420 | 0.01270 | 0.00620 | 0.02820 | 0.01910 | 0.01290 | 0.02080 | 0.01800 | 0.00780 | 0.02170 | 0.01770 | 0.00530 | 0.01890 | 0.02490 | 0.01750 | 0.01740 | 0.02430 | 0.01120 | 0.01720 | 0.01440 | 0.00760 |
| V05       | 441.14 | 2.32 |                        | 0.01740 | 0.02260 | 0.02420 | 0.02320 | 0.02910 | 0.02810 | 0.02010 | 0.02240 | 0.02800 | 0.01770 | 0.02130 | 0.02640 | 0.01710 | 0.02070 | 0.01810 | 0.01880 | 0.02030 | 0.02390 | 0.02260 | 0.02430 | 0.03130 |
| V06       | 167.02 | 2.16 |                        | 0.02020 | 0.02440 | 0.02740 | 0.01770 | 0.03010 | 0.03130 | 0.01920 | 0.01950 | 0.02150 | 0.01100 | 0.02310 | 0.02360 | 0.01930 | 0.01690 | 0.02310 | 0.01690 | 0.02090 | 0.02160 | 0.01820 | 0.02850 | 0.02830 |
| V07       | 287.18 | 2.08 |                        | 0.03350 | 0.04280 | 0.03930 | 0.03170 | 0.04120 | 0.04050 | 0.03320 | 0.04130 | 0.04190 | 0.02930 | 0.04160 | 0.04250 | 0.03550 | 0.03490 | 0.03890 | 0.03260 | 0.04010 | 0.04140 | 0.03630 | 0.04240 | 0.04400 |
| V08       | 457.20 | 2.02 |                        | 0.01840 | 0.02460 | 0.02430 | 0.01870 | 0.02530 | 0.02710 | 0.02030 | 0.02370 | 0.02530 | 0.01500 | 0.02350 | 0.02690 | 0.02110 | 0.02020 | 0.02290 | 0.01930 | 0.02240 | 0.02510 | 0.02070 | 0.02610 | 0.02680 |
| V09       | 166.02 | 2.01 |                        | 0.04110 | 0.04880 | 0.04720 | 0.03150 | 0.04970 | 0.04680 | 0.04130 | 0.04830 | 0.04580 | 0.02840 | 0.04720 | 0.04750 | 0.04080 | 0.03790 | 0.04940 | 0.04040 | 0.04800 | 0.04600 | 0.04200 | 0.05490 | 0.05130 |
| V10       | 168.06 | 2.00 |                        | 0.02010 | 0.02660 | 0.02670 | 0.02160 | 0.02760 | 0.02640 | 0.02350 | 0.02720 | 0.03310 | 0.02200 | 0.02880 | 0.02880 | 0.01890 | 0.02170 | 0.01980 | 0.02080 | 0.02380 | 0.02720 | 0.02470 | 0.02700 | 0.03320 |
| V11       | 136.99 | 2.00 |                        | 0.03590 | 0.04550 | 0.04220 | 0.03360 | 0.04430 | 0.04410 | 0.03490 | 0.04430 | 0.04190 | 0.03110 | 0.04410 | 0.04750 | 0.04240 | 0.04460 | 0.05190 | 0.03490 | 0.04410 | 0.04580 | 0.03820 | 0.04430 | 0.04410 |
| V12       | 116.99 | 1.99 |                        | 0.01580 | 0.01990 | 0.01870 | 0.01580 | 0.02200 | 0.02050 | 0.01750 | 0.02100 | 0.02330 | 0.01910 | 0.01810 | 0.02760 | 0.01610 | 0.02000 | 0.01610 | 0.01560 | 0.02080 | 0.02480 | 0.01980 | 0.01940 | 0.02440 |
| V13       | 176.01 | 1.88 |                        | 0.00660 | 0.00380 | 0.00010 | 0.00800 | 0.00310 | 0.00270 | 0.00510 | 0.00510 | 0.00260 | 0.00730 | 0.00770 | 0.00010 | 0.00710 | 0.00460 | 0.00390 | 0.00510 | 0.00560 | 0.00440 | 0.00600 | 0.00390 | 0.00010 |
| V14       | 209.19 | 1.82 |                        | 0.00480 | 0.00450 | 0.00010 | 0.00470 | 0.00010 | 0.00320 | 0.00440 | 0.00460 | 0.00010 | 0.00010 | 0.00010 | 0.00010 | 0.00450 | 0.00010 | 0.00400 | 0.00440 | 0.00500 | 0.00010 | 0.00490 | 0.00410 | 0.00010 |
| V15       | 177.14 | 1.79 |                        | 0.00850 | 0.00010 | 0.00010 | 0.00960 | 0.00010 | 0.00010 | 0.00760 | 0.00010 | 0.00010 | 0.00870 | 0.00010 | 0.00010 | 0.00850 | 0.00010 | 0.00010 | 0.00750 | 0.00870 | 0.00010 | 0.00780 | 0.00010 | 0.00010 |
| V16       | 125.02 | 1.74 |                        | 0.00720 | 0.00010 | 0.00010 | 0.00700 | 0.00010 | 0.00460 | 0.00660 | 0.00010 | 0.00010 | 0.00910 | 0.00010 | 0.00010 | 0.00740 | 0.00730 | 0.00640 | 0.00630 | 0.00010 | 0.00010 | 0.00740 | 0.00010 | 0.00010 |
| V17       | 288.20 | 1.74 |                        | 0.01650 | 0.02010 | 0.01800 | 0.01510 | 0.02120 | 0.02050 | 0.01570 | 0.01890 | 0.01940 | 0.01560 | 0.01750 | 0.02650 | 0.01800 | 0.01860 | 0.01840 | 0.01550 | 0.02150 | 0.02410 | 0.01780 | 0.01940 | 0.02110 |
| V18       | 204.14 | 1.72 |                        | 0.00940 | 0.01320 | 0.01380 | 0.00970 | 0.01400 | 0.01560 | 0.01010 | 0.01220 | 0.01400 | 0.00730 | 0.01250 | 0.01640 | 0.01010 | 0.01000 | 0.01210 | 0.00960 | 0.01130 | 0.01330 | 0.01040 | 0.01390 | 0.01460 |
| V19       | 144.99 | 1.50 |                        | 0.01590 | 0.00010 | 0.00010 | 0.00010 | 0.00010 | 0.00010 | 0.00010 | 0.00010 | 0.00010 | 0.00010 | 0.00010 | 0.00010 | 0.00010 | 0.00010 | 0.00010 | 0.00010 | 0.01970 | 0.00010 | 0.00010 | 0.02430 | 0.00010 |
| V20       | 162.64 | 1.49 |                        | 0.00010 | 0.00580 | 0.00530 | 0.00010 | 0.00590 | 0.00580 | 0.00010 | 0.00580 | 0.00560 | 0.00010 | 0.00580 | 0.00570 | 0.00010 | 0.00010 | 0.00580 | 0.00550 | 0.00010 | 0.00590 | 0.00630 | 0.00610 | 0.00600 |
| V21       | 138.00 | 1.48 |                        | 0.00920 | 0.01210 | 0.01130 | 0.00930 | 0.01290 | 0.01240 | 0.01030 | 0.01230 | 0.01350 | 0.01050 | 0.01100 | 0.01690 | 0.00840 | 0.01020 | 0.00870 | 0.00900 | 0.01190 | 0.01440 | 0.01110 | 0.01150 | 0.01440 |
| V22       | 755.31 | 1.46 |                        | 0.01170 | 0.01220 | 0.01200 | 0.00370 | 0.00640 | 0.00490 | 0.01450 | 0.01310 | 0.00850 | 0.01030 | 0.01520 | 0.00970 | 0.00010 | 0.00010 | 0.00010 | 0.01500 | 0.01350 | 0.00850 | 0.00920 | 0.00850 | 0.00430 |
| V23       | 128.00 | 1.45 |                        | 0.00430 | 0.00180 | 0.00010 | 0.01670 | 0.00640 | 0.00240 | 0.00740 | 0.00610 | 0.00010 | 0.01520 | 0.00340 | 0.00010 | 0.00530 | 0.00610 | 0.00370 | 0.00930 | 0.00550 | 0.00210 | 0.01210 | 0.00300 | 0.00240 |
| V24       | 175.44 | 1.34 |                        | 0.00200 | 0.00190 | 0.00170 | 0.01280 | 0.00010 | 0.00190 | 0.00180 | 0.00190 | 0.00170 | 0.01810 | 0.00010 | 0.00220 | 0.00010 | 0.00010 | 0.00010 | 0.00200 | 0.00200 | 0.00210 | 0.00230 | 0.00210 | 0.00010 |
| V25       | 307.24 | 1.34 |                        | 0.00440 | 0.00530 | 0.00500 | 0.00400 | 0.00010 | 0.00010 | 0.00490 | 0.00510 | 0.00010 | 0.00430 | 0.00010 | 0.00010 | 0.00390 | 0.00400 | 0.00370 | 0.00440 | 0.00490 | 0.00520 | 0.00510 | 0.00510 | 0.00010 |
| V26       | 145.99 | 1.25 |                        | 0.01070 | 0.00620 | 0.00510 | 0.01140 | 0.00740 | 0.00520 | 0.01190 | 0.01000 | 0.00710 | 0.01500 | 0.00810 | 0.00360 | 0.00960 | 0.00810 | 0.00630 | 0.01150 | 0.01060 | 0.00860 | 0.01290 | 0.00910 | 0.00760 |
| V27       | 293.20 | 1.24 |                        | 0.00010 | 0.00010 | 0.00260 | 0.00010 | 0.00010 | 0.00290 | 0.00010 | 0.00010 | 0.00010 | 0.00010 | 0.00010 | 0.00010 | 0.00010 | 0.00010 | 0.00010 | 0.00010 | 0.00010 | 0.00010 | 0.00010 | 0.00320 | 0.00340 |
| V28       | 126.97 | 1.23 |                        | 0.00850 | 0.00430 | 0.00010 | 0.00680 | 0.00510 | 0.00010 | 0.00660 | 0.00450 | 0.00010 | 0.00720 | 0.00360 | 0.00400 | 0.00650 | 0.00700 | 0.00380 | 0.00610 | 0.00690 | 0.00470 | 0.00730 | 0.00380 | 0.00400 |
| V29       | 756.29 | 1.23 |                        | 0.00410 | 0.00440 | 0.00440 | 0.00010 | 0.00010 | 0.00010 | 0.00530 | 0.00470 | 0.00290 | 0.00010 | 0.00550 | 0.00350 | 0.00010 | 0.00010 | 0.00010 | 0.00560 | 0.00480 | 0.00260 | 0.00310 | 0.00010 | 0.00010 |
| V30       | 456.09 | 1.20 |                        | 0.01440 | 0.01790 | 0.01790 | 0.01090 | 0.01810 | 0.01750 | 0.01540 | 0.01820 | 0.01610 | 0.00970 | 0.01720 | 0.01640 | 0.01380 | 0.01220 | 0.01770 | 0.01460 | 0.01730 | 0.01630 | 0.01450 | 0.02140 | 0.01900 |
| V31       | 202.14 | 1.17 |                        | 0.00740 | 0.00010 | 0.00010 | 0.00010 | 0.00010 | 0.00010 | 0.00010 | 0.00010 | 0.00010 | 0.00010 | 0.00010 | 0.00010 | 0.00010 | 0.00010 | 0.00010 | 0.00640 | 0.00010 | 0.00010 | 0.00010 | 0.00010 | 0.00010 |
| V32       | 160.13 | 1.15 |                        | 0.00960 | 0.00700 | 0.00420 | 0.00720 | 0.00630 | 0.00440 | 0.00770 | 0.00780 | 0.00500 | 0.00970 | 0.00690 | 0.00010 | 0.01030 | 0.00010 | 0.00530 | 0.00970 | 0.00900 | 0.00570 | 0.00990 | 0.00710 | 0.00560 |
| V33       | 124.01 | 1.15 |                        | 0.00800 | 0.01020 | 0.00890 | 0.00730 | 0.00960 | 0.00970 | 0.00710 | 0.00880 | 0.00920 | 0.00710 | 0.00850 | 0.01310 | 0.00810 | 0.00790 | 0.00830 | 0.00730 | 0.01050 | 0.01210 | 0.00800 | 0.00970 | 0.01040 |
| V34       | 479.57 | 1.14 |                        | 0.00830 | 0.01010 | 0.02060 | 0.00010 | 0.00010 | 0.00910 | 0.00880 | 0.00010 | 0.01390 | 0.00010 | 0.01020 | 0.01940 | 0.03020 | 0.02440 | 0.03290 | 0.00770 | 0.00010 | 0.01480 | 0.00010 | 0.00760 | 0.00860 |
| V35       | 220.15 | 1.10 |                        | 0.00340 | 0.00010 | 0.00010 | 0.00010 | 0.00010 | 0.00010 | 0.00250 | 0.00010 | 0.00010 | 0.00010 | 0.00010 | 0.00010 | 0.00010 | 0.00010 | 0.00010 | 0.00260 | 0.00010 | 0.00010 | 0.00010 | 0.00010 | 0.00010 |
| V36       | 304.16 | 1.06 |                        | 0.00720 | 0.00970 | 0.00970 | 0.00680 | 0.00890 | 0.00980 | 0.00810 | 0.00910 | 0.01010 | 0.00890 | 0.00890 | 0.01010 | 0.00660 | 0.00640 | 0.00680 | 0.00730 | 0.00790 | 0.00860 | 0.00810 | 0.00970 | 0.01070 |
| V37       | 286.15 | 1.02 |                        | 0.00710 | 0.00920 | 0.01010 | 0.00600 | 0.00820 | 0.00930 | 0.00850 | 0.00910 | 0.00980 | 0.00640 | 0.00970 | 0.01060 | 0.00940 | 0.00840 | 0.00920 | 0.00800 | 0.00800 | 0.00910 | 0.00770 | 0.00980 | 0.00920 |
| V38       | 354.53 | 1.01 |                        | 0.00190 | 0.00010 | 0.00010 | 0.00140 | 0.00010 | 0.00010 | 0.00170 | 0.00010 | 0.00010 | 0.00010 | 0.00010 | 0.00010 | 0.00010 | 0.00010 | 0.00010 | 0.00180 | 0.00010 | 0.00010 | 0.00200 | 0.00010 | 0.00010 |
